# Supplementary material for: Development of the catalytic reactivity of an oxo–peroxo Mo(vi) Schiff base complex supported on supermagnetic nanoparticles as a reusable green nanocatalyst for selective epoxidation of olefins
Source: Royal Society of Chemistry journal article supplement (doi:10.1039/c5ra27751e), 2016-01-01
Supplement: c5ra27751e1.pdf [file c5ra27751e1.pdf]

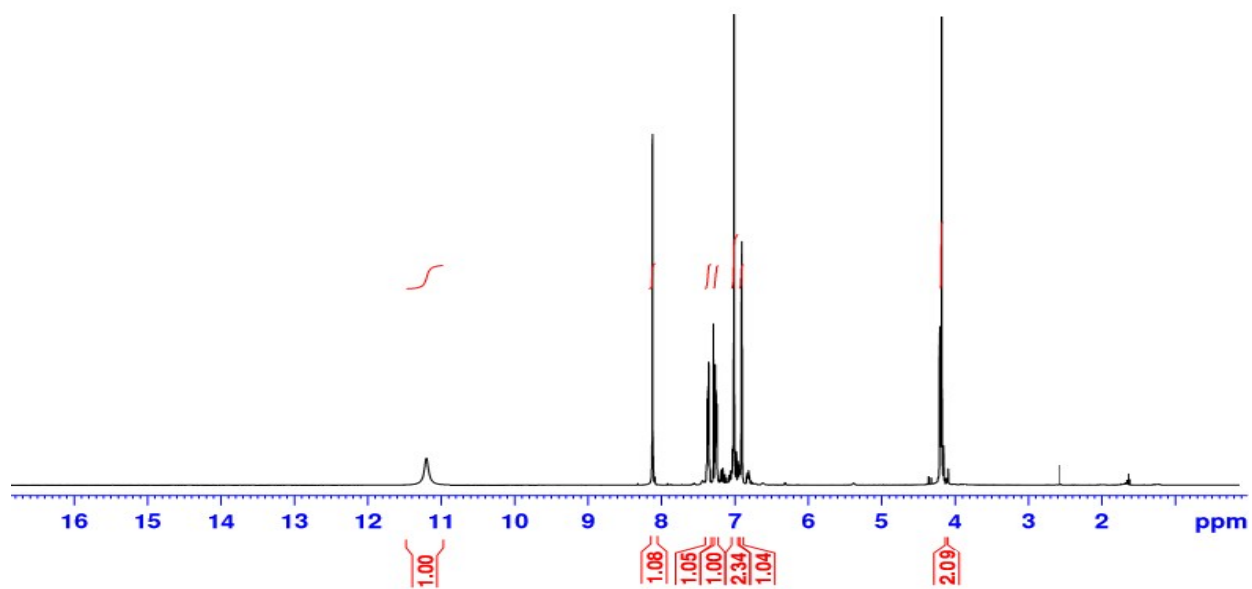

Figure S1. <sup>1</sup>H NMR of N,N-bis(5-chloromethyl-salicylidene)-1,2-phenylenediamine (5-CM-salop)

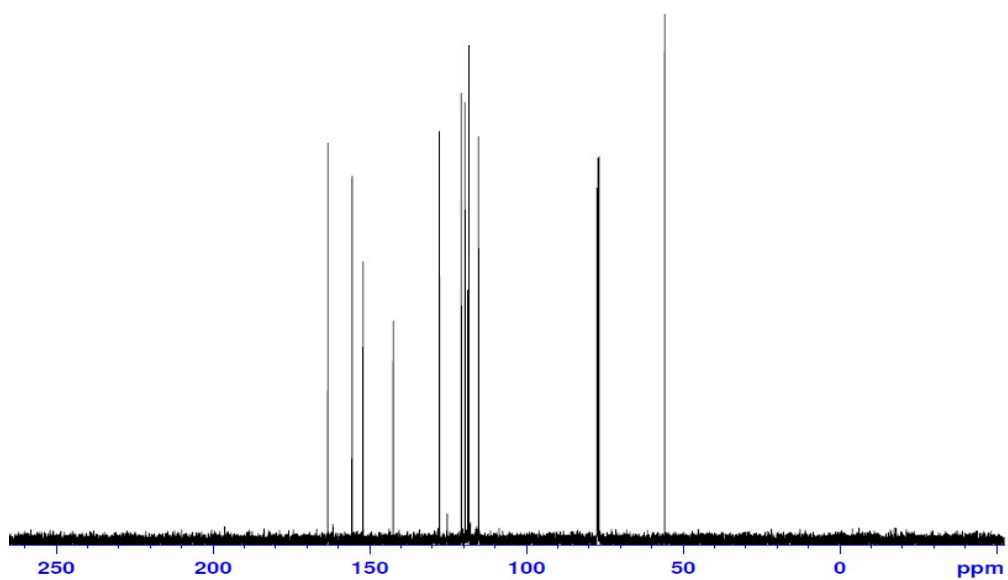

Figure S2. <sup>13</sup>C NMR of N,N-bis(5-chloromethyl-salicylidene)-1,2-phenylenediamine (5-CM-salop)

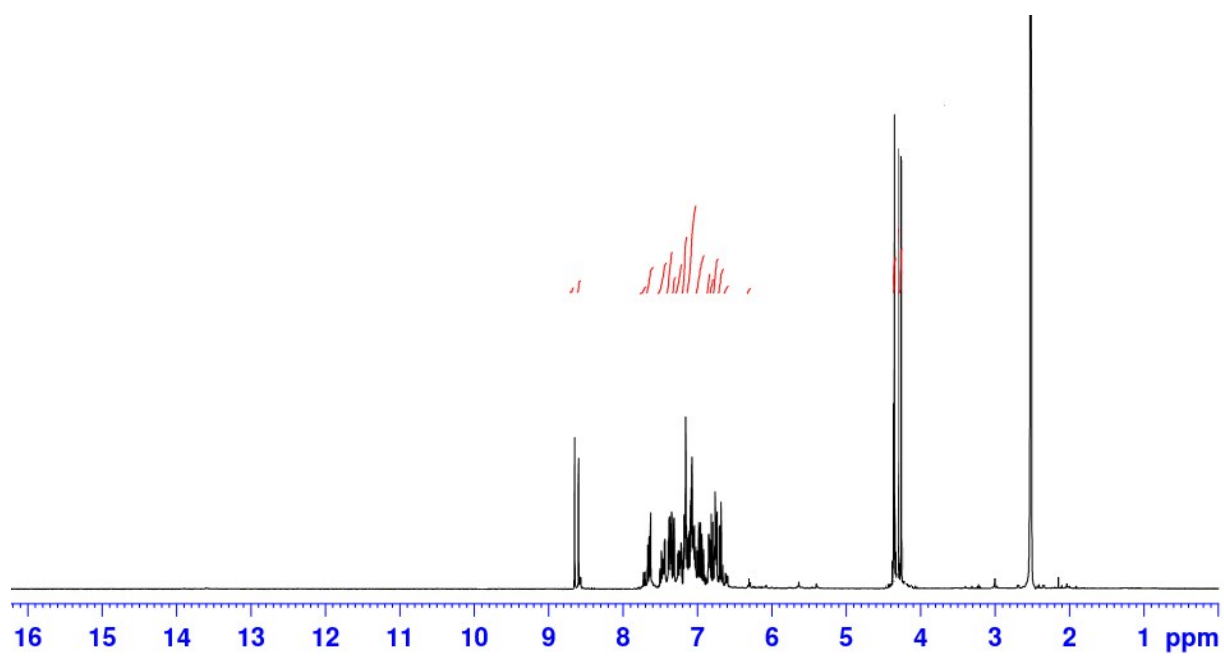

Figure S3.  $^1\text{H}$ NMR of 5-CM-salophMo(O<sub>2</sub>)O complex

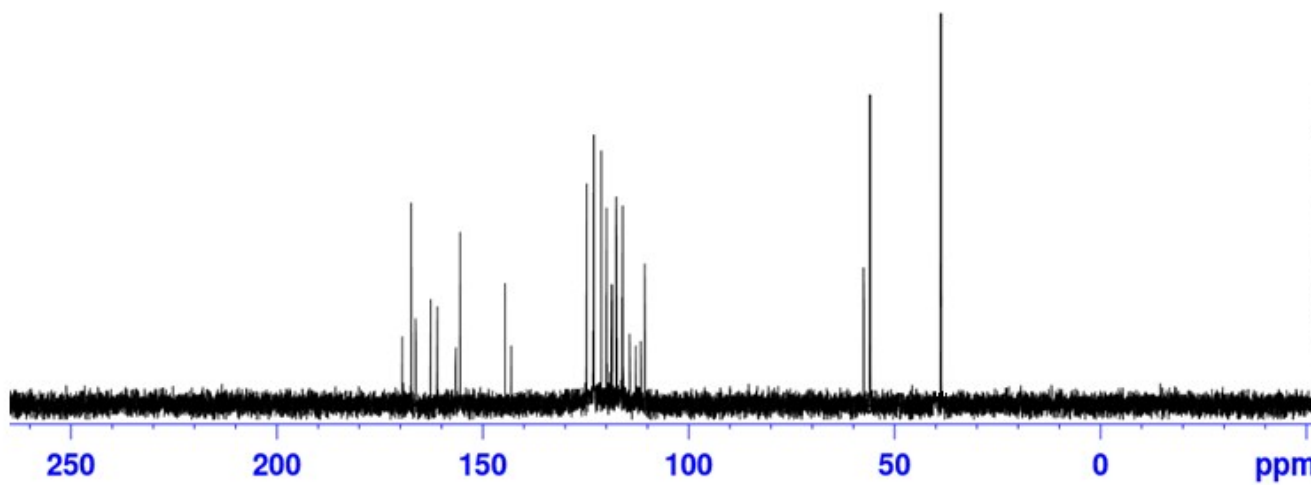

Figure S4.  $^{13}\text{C}$ NMR of 5-CM-salophMo(O<sub>2</sub>)O complex
